# Supplementary material for: Age, growth and natural mortality of coney (Cephalopholis fulva) from the southeastern United States
Source: PeerJ. 2015 Mar 19;3:e825. doi: 10.7717/peerj.825 (PMC4369328; doi:10.7717/peerj.825)
Supplement: Supplemental Information 1 [file peerj-03-825-s001.xlsx]

## Sheet: Sheet1
Box #	place_in_box	BurtonRings	Carr_Rings	Potts_age	B-C_avg	B-C_Error	B_C_APE		B-P_avg	B-P_error	B-P_APE		C-P_avg	C-P_error	C-P _APE	envelope_no	species	coll. No	Month	Day	Year	Area	County	State	TL_mm	FL_mm	SL_mm	Wt.	Wt Units	Fishery	Type	Vessel	Gear	Depth	Depth Units	Sex	MLB_edge
1	1	6	5	5	5.5	0.0909091	8.0324		5.5	0.0909091	6.42806		5	0	8.14075	1	coney	27065-38	2	26	1996	5		SC	317			0.58	kg	Comm			610			U	2
1	2	3	3	3	3	0			3	0			3	0		2	coney	29951-93	6	8	1998	5		SC	284			0.4	kg	Rec	HB		610			U	3
1	3	4	4	5	4	0			4.5	0.111111			4.5	0.111111		3	coney	29954-77	6	11	1998	4		SC	302			0.47	kg	Rec	HB		610			U	3
1	4	8	8	11	8	0			9.5	0.157895			9.5	0.157895		4	coney	9810812-33	8		1998	10		NC	342					CM	CM						2
1	5	4	5	5	4.5	0.111111			4.5	0.111111			5	0		5	coney	9810812-32	8		1998	10		NC	323					CM	CM						3
1	6	4	5	5	4.5	0.111111			4.5	0.111111			5	0		6	coney	99103800437	11	23	1999				302					CM	CM		611			U	2
1	7	5	5	5	5	0			5	0			5	0		7	coney	98103800065	10	7	1998		23-99??		310					CM	CM		611			U	2
1	8			3												8	coney	TQ0301142-D	10	23	2003	11		FL	262					Rec	PC				M		2
1	9	4	4	4	4	0			4	0			4	0		9	coney	TQ0301536-D	12	7	2003	11		FL	309	309				Rec	PC				M		2
1	10	7	6	7	6.5	0.0769231			7	0			6.5	0.0769231		10	coney		9	25	2003	10			315					cm		Booger					2
1	11	8	6	7	7	0.142857			7.5	0.0666667			6.5	0.0769231		11	coney		4	1	2003	10			355					cm		Split Decision					1
1	12	6	6	6	6	0			6	0			6	0		12	coney	NCDMF040026	7	13	2004	10		NC	375					cm							2
1	13			2												13	coney	36251	2	7	2004	11		FL	325			0.71	kg	rec	HB						4
1	14			5												14	coney	36232	1	21	2004	11		FL	322	322		0.57	kg	rec	HB				M		2
1	15	6	7	7	6.5	0.0769231			6.5	0.0769231			7	0		15	coney	36251	2	7	2004	11		FL	282			0.45	kg	rec	HB				U		3
1	16	3	3	3	3	0			3	0			3	0		16	coney	36567	7	18	2004	11		FL	275	275		0.34	kg	rec	HB						2
1	17	1	1	1	1	0			1	0			1	0		17	coney	36514	6	7	2004	11		FL	247	247		0.28	kg	rec	HB						4
1	18	2		2					2	0						18	coney	36854	10	17	2004	11		FL	252	252		0.29	kg	rec	HB						2
1	19	3	3	3	3	0			3	0			3	0		19	coney	36226	1	17	2004	11		FL	252	252		0.27	kg	rec	HB						2
1	20	2		1					1.5	0.333333						20	coney	36882	11	22	2004	11		FL	275	275		0.35	kg	rec	HB						4
1	21	4	4	3	4	0			3.5	0.142857			3.5	0.142857		21	coney	233257-51	11	2	2004			NC	260					CM	Bandit						3
1	22	8	7	8	7.5	0.0666667			8	0			7.5	0.0666667		22	coney	233257-12	11	2	2004			NC	340					CM	Bandit						3
1	23	4	4	4	4	0			4	0			4	0		23	coney	233180-1	10	13	2004			NC	255					CM	Bandit						3
1	24	8	8	8	8	0			8	0			8	0		24	coney	233180-2	10	13	2004			NC	330					CM	Bandit						2
1	25	4	4	4	4	0			4	0			4	0		25	coney	233180-3	10	13	2004			NC	320					CM	Bandit						3
1	26	13	13	11	13	0			12	0.0833333			12	0.0833333		26	coney	233180-4	10	13	2004			NC	345					CM	Bandit						3
1	27	7	9	11	8	0.125			9	0.222222			10	0.1		27	coney	TQ0402242-D	11	4	2004	11		FL	337	337		0.64	kg	rec	HB				M		3
1	28	3	4	3	3.5	0.142857			3	0			3.5	0.142857		28	coney	NCDMF040061-2	8	27	2004			NC	290					CM	Bandit						4
1	29	8	8	9	8	0			8.5	0.0588235			8.5	0.0588235		29	coney	NCDMF040061-1	8	27	2004			NC	340					CM	Bandit						2
1	30	3	6	8	4.5	0.333333			5.5	0.454545			7	0.142857		30	coney	20040721410	7	13	2004				345										F		4
1	31	14	14	19	14	0			16.5	0.151515			16.5	0.151515		31	coney	20040721408	7	13	2004				382										U		2
1	32	4	4	4	4	0			4	0			4	0		32	coney	20040721409	7	13	2004				356										F		3
1	33	3	3	3	3	0			3	0			3	0		33	coney	303677	1	3	2005	10		NC	245					CM							4
1	34	4	4	5	4	0			4.5	0.111111			4.5	0.111111		34	coney	303609	1	13	2005	10		NC	310					CM							2
1	35	10	10	10	10	0			10	0			10	0		35	coney	303610	1	13	2005	10		NC	390					CM							1
1	36	3	3	3	3	0			3	0			3	0		36	coney	303608	1	14	2005	10		NC	285					CM							4
1	37	3	4	2	3.5	0.142857			2.5	0.2			3	0.333333		37	coney	303605	1	14	2005	10		NC	220					CM							4
1	38	5	5	5	5	0			5	0			5	0		38	coney		2	10	2005	10		NC	320					CM							3
1	39	7	6	7	6.5	0.0769231			7	0			6.5	0.0769231		39	coney	303652	2	10	2005	10		NC	335					CM							3
1	40	9	9	10	9	0			9.5	0.0526316			9.5	0.0526316		40	coney	303652	2	10	2005	10		NC	370					CM							2
1	41	5	5	5	5	0			5	0			5	0		41	coney		2	14	2005	10		NC	335					CM							2
1	42	4	4	4	4	0			4	0			4	0		42	coney		2	10	2005	10		NC	320					CM							2
1	43	7	6	7	6.5	0.0769231			7	0			6.5	0.0769231		43	coney	303647	2	16	2005	10		NC	350					CM							2
1	44	8	8	8	8	0			8	0			8	0		44	coney	303647	2	16	2005	10		NC	360					CM							2
1	45	3	2	3	2.5	0.2			3	0			2.5	0.2		45	coney	303646	2	17	2005	10		NC	270					CM							3
1	46	10	10	11	10	0			10.5	0.047619			10.5	0.047619		46	coney	303550	2	22	2005	10		NC	325					CM							2
1	47	10	11	11	10.5	0.047619			10.5	0.047619			11	0		47	coney	303546	3	11	2005	10		NC	360					CM							2
1	48			8												48	coney	303547	3	11	2005	10		NC	395					CM							4
1	49	6	6	5	6	0			5.5	0.0909091			5.5	0.0909091		49	coney	303547	3	11	2005	10		NC	340					CM							3
1	50	5	5	5	5	0			5	0			5	0		50	coney	20060130709	3	14	2006	5		SC	310					CM							2
1	51	5	5	8	5	0			6.5	0.230769			6.5	0.230769		51	coney	20060130710	3	14	2006	5		SC	330					CM							2
1	52	4	4	5	4	0			4.5	0.111111			4.5	0.111111		52	coney	303540	3	28	2005	10		NC	305					CM							2
1	53	4	4	4	4	0			4	0			4	0		53	coney	305532	3	28	2005	10		NC	270					CM							1
1	54	4	4	4	4	0			4	0			4	0		54	coney	303822	4	13	2005	10		NC	305					CM							2
1	55	7	8	10	7.5	0.0666667			8.5	0.176471			9	0.111111		55	coney	37132-14	4	14	2005	12		FL	360			0.83	kg	rec	HB						2
1	56	12	12	13	12	0			12.5	0.04			12.5	0.04		56	coney	303830	5	5	2005	10		NC	380					CM							2
1	57	5	4	5	4.5	0.111111			5	0			4.5	0.111111		57	coney	303830	5	5	2005	10		NC	340					CM							3
1	58	11	9	12	10	0.1			11.5	0.0434783			10.5	0.142857		58	coney	303830	5	5	2005	10		NC	430					CM							2
1	59	3	3	3	3	0			3	0			3	0		59	coney	303813	5	12	2005	10		NC	270					CM							3
1	60	4	4	5	4	0			4.5	0.111111			4.5	0.111111		60	coney	303813	5	12	2005	10		NC	320					CM							3
1	61	7	6	7	6.5	0.0769231			7	0			6.5	0.0769231		61	coney	303857	5	19	2005	10		NC	335					CM							3
1	62	5	5	7	5	0			6	0.166667			6	0.166667		62	coney	303857	5	19	2005	10		NC	330					CM							3
1	63	4	4	5	4	0			4.5	0.111111			4.5	0.111111		63	coney	303923	5	31	2005	10		NC	315					CM							3
1	64	15		17					16	0.0625						64	coney	303923	5	31	2005	10		NC	365					CM							3
1	65	8	9	8	8.5	0.0588235			8	0			8.5	0.0588235		65	coney	303923	5	31	2005	10		NC	370					CM							2
1	66	9	8	14	8.5	0.0588235			11.5	0.217391			11	0.272727		66	coney	303923	5	31	2005	10		NC	370					CM							3
1	67	4	4	5	4	0			4.5	0.111111			4.5	0.111111		67	coney	303923	5	31	2005	10		NC	315					CM							3
1	68	7	10	10	8.5	0.176471			8.5	0.176471			10	0		68	coney	303923	5	31	2005	10		NC	320					CM							2
1	69	10	9	11	9.5	0.0526316			10.5	0.047619			10	0.1		69	coney	303923	5	31	2005	10		NC	340					CM							2
1	70	11		12					11.5	0.0434783						70	coney	303752	6	8	2005	10		NC	370			0.85	kg	CM							3
1	71	4	3	3	3.5	0.142857			3.5	0.142857			3	0		71	coney	303745	6	20	2005	10		NC	275			0.4	kg	CM							4
1	72	4	4	4	4	0			4	0			4	0		72	coney	303745	6	20	2005	10		NC	305			0.55	kg	CM							3
1	73	4	5	4	4.5	0.111111			4	0			4.5	0.111111		73	coney	303763	7	14	2005	10		NC	330					CM							3
1	74	4	4	4	4	0			4	0			4	0		74	coney	303763	7	14	2005	10		NC	310					CM							3
1	75	4	4	5	4	0			4.5	0.111111			4.5	0.111111		75	coney	303764	7	18	2005	10		NC	315					CM							3
1	76	4	4	5	4	0			4.5	0.111111			4.5	0.111111		76	coney	303789	8	9	2005	10		NC	335					CM							2
1	77	4	4	4	4	0			4	0			4	0		77	coney	303789	8	9	2005	10		NC	335					CM							3
1	78	4	3	3	3.5	0.142857			3.5	0.142857			3	0		78	coney	TQ0502558-D	8	13	2005	11		FL	245			0.23	kg							F	3
1	79	3	3	4	3	0			3.5	0.142857			3.5	0.142857		79	coney	303836	8	15	2005	10		NC	260					CM							2
1	80	4	4	5	4	0			4.5	0.111111			4.5	0.111111		80	coney	303836	8	15	2005	10		NC	320					CM							3
1	81	6	5	6	5.5	0.0909091			6	0			5.5	0.0909091		81	coney	303795	8	24	2005	10		NC	330					CM							3
1	82	5	5	6	5	0			5.5	0.0909091			5.5	0.0909091		82	coney	303795	8	24	2005	10		NC	305					CM							2
1	83	3	2	4	2.5	0.2			3.5	0.142857			3	0.333333		83	coney	303913	9	22	2005	10		NC	310					CM							3
1	84	4	3	2	3.5	0.142857			3	0.333333			2.5	0.2		84	coney	TQ0502939-D	10	12	2005	11		FL	257			0.33	kg							F	3
1	85	2		2					2	0						85	coney	TQ0501921-D	10	14	2005	11		FL	260											U	4
1	86			3												86	coney	TQ0502938-D	10	12	2005	11		FL	285			0.4	kg							U	2
1	87	4	4	6	4	0			5	0.2			5	0.2		87	coney	20050130884	12	12	2005	5		SC	330					CM							3
1	88	2		3					2.5	0.2						88	coney	TQ0502534-D	8	7	2005	11		FL	287			0.4	kg								4
1	89	2		3					2.5	0.2						89	coney	TQ0502504	8	7	2005	11		FL	280			0.39	kg							F	4
1	90	4							4	0						90	coney	TQ0501382-D	5	25	2005	11		FL	255			0.13	kg								2
1	91	3		2					2.5	0.2						91	coney	TQ0501339-D	3	18	2005	11		FL	247			0.27	kg							M	1
1	92	4		1					2.5	0.6						92	coney	TQ0502748-D	10	4	2005	11		FL	227			0.2	kg								2
1	93	3		3					3	0						93	coney	TQ0500585	5	7	2005	11		FL	301			0.45	kg							M	2
1	94	3	2	2	2.5	0.2			2.5	0.2			2	0		94	coney	TQ0500598-D	5	9	2005	11		FL	257			0.28	kg								3
1	95	2	2	2	2	0			2	0			2	0		95	coney	TQ0501536-D	6	21	2005	11		FL	267			0.35	kg							M	3
1	96	3	2	2	2.5	0.2			2.5	0.2			2	0		96	coney	TQ0600466-D	3	9	2006	11		FL	273			0.35	kg								2
1	97	4	6	8	5	0.2			6	0.333333			7	0.142857		97	coney	20060132290	7	25	2006	5		SC	350					CM							2
1	98	5	5	6	5	0			5.5	0.0909091			5.5	0.0909091		98	coney	20060134554	12	20	2006	5		SC	340					CM							4
1	99	12		12					12	0						99	coney	20060134555	12	20	2006	5		SC	350					CM							4
1	100	5	4	5	4.5	0.111111			5	0			4.5	0.111111		100	coney	20060132387	7	11	2006	5		SC	300					CM							3
2	1	7	6	7	6.5	0.0769231			7	0			6.5	0.0769231		101	coney	20060131605	6	9	2006	5		SC	350					CM							2
2	2															102	coney	20060134367	12	13	2005	5		SC	320					CM
2	3	15	14	18	14.5	0.0344828			16.5	0.0909091			16	0.125		103	coney	20060131044	4	6	2006	5		SC	390					CM							2
2	4	3	3	3	3	0			3	0			3	0		104	coney	TQ0602089-D	8	17	2006	11		FL	260											U	3
2	5	3	3	3	3	0			3	0			3	0		105	coney	TQ0602088-D	8	17	2006	11		FL	268			0.3	kg							F	2
2	6	5	5	5	5	0			5	0			5	0		106	coney	303733	11	16	2006	10		NC	315					CM							3
2	7	5	3	4	4	0.25			4.5	0.111111			3.5	0.142857		107	coney	304033	12	13	2006	10		NC	325					CM							3
2	8	8		7	8	0			7.5	0.0666667						108	coney	303704	10	5	2006	10		NC	321					CM							3
2	9															109	coney	303704	10	5	2006	10		NC	333					CM
2	10	5	3	4	4	0.25			4.5	0.111111			3.5	0.142857		110	coney	303704	10	5	2006	10		NC	353					CM							3
2	11	7	4	6	5.5	0.272727			6.5	0.0769231			5	0.2		111	coney	303704	10	5	2006	10		NC	380					CM							3
2	12	7	5	6	6	0.166667			6.5	0.0769231			5.5	0.0909091		112	coney	303705	10	5	2006	10		NC	357					CM							3
2	13	5	2	2	3.5	0.428571			3.5	0.428571			2	0		113	coney	TQ0602110-D	8	17	2006	11		FL	218			0.17	kg								2
2	14	5	4	5	4.5	0.111111			5	0			4.5	0.111111		114	coney	20060130595	3	7	2006	5		SC	320					CM							4
2	15	10	7	8	8.5	0.176471			9	0.111111			7.5	0.0666667		115	coney	20060130082	1	13	2006	5		SC	330					CM							4
2	16	7	5	7	6	0.166667			7	0			6	0.166667		116	coney	20060130662	3	13	2006	5		SC	370					CM							4
2	17	4	3	3	3.5	0.142857			3.5	0.142857			3	0		117	coney	20060130249	1	17	2006	5		SC	270					CM							4
2	18		5	7									6	0.166667		118	coney	20060130309	2	2	2006	5		SC	350					CM							4
2	19	2	1	2	1.5	0.333333			2	0			1.5	0.333333		119	coney	TQ0600900-D	3	7	2006	11		FL	275			0.39	kg							U	4
2	20	3	3	2	3	0			2.5	0.2			2.5	0.2		120	coney	TQ0601412-D	6	28	2006	11		FL	290			0.39	kg							F	2
2	21	2	1	2	1.5	0.333333			2	0			1.5	0.333333		121	coney	TQ0600944-D	4	3	2006	11		FL	277			0.36	kg							U	4
2	22	3	2	2	2.5	0.2			2.5	0.2			2	0		122	coney	TQ0601338-D	6	10	2006	11		FL	295			0.39	kg							U	2
2	23	2	2	2	2	0			2	0			2	0		123	coney	TQ0602376-D	10	23	2006	11		FL	240			0.21	kg							F	4
2	24	3	2	2	2.5	0.2			2.5	0.2			2	0		124	coney	TQ0600290-D	3	3	2006	11		FL	270			0.37	kg							F	4
2	25	3	2	3	2.5	0.2			3	0			2.5	0.2		125	coney	TQ0600086-D	1	13	2006	11		FL	280			0.42	kg							F	2
2	26	3	3	3	3	0			3	0			3	0		126	coney	Tq0601537-D	7	15	2006	11		FL	250			0.29	kg							F	3
2	27	4	3	3	3.5	0.142857			3.5	0.142857			3	0		127	coney	TQ0602702-D	11	28	2006	11		FL	280			0.39	kg							F	3
2	28	4	3	3	3.5	0.142857			3.5	0.142857			3	0		128	coney	TQ0602681-D	11	28	2006	11		FL	295											F	3
2	29	3	3	2	3	0			2.5	0.2			2.5	0.2		129	coney	TQ0600768-D	1	31	2006	11		FL	277			0.33	kg							M	4
2	30	3	4	3	3.5	0.142857			3	0			3.5	0.142857		130	coney	TQ0601543-D	7	17	2006	11		FL	305			0.41	kg							F	4
2	31	2	2	2	2	0			2	0			2	0		131	coney	TQ0600057-D	1	13	2006	11		FL	250			0.29	kg							F	4
2	32	5	1	1	3	0.666667			3	0.666667			1	0		132	coney	TQ0600920-D	3	13	2006	11		FL	245			0.25	kg							U	4
2	33	4	3	3	3.5	0.142857			3.5	0.142857			3	0		133	coney	TQ0602520-D	8	7	2006	11		FL	290											F	2
2	34	3	3	3	3	0			3	0			3	0		134	coney	TQ0601609-D	7	21	2006	11		FL	275			0.38	kg							F	2
2	35	3	3	4	3	0			3.5	0.142857			3.5	0.142857		135	coney	TQ0602272-D	10	16	2006	11		FL	302			0.49	kg							M	3
2	36	4	3	3	3.5	0.142857			3.5	0.142857			3	0		136	coney	TQ0602273-D	10	16	2006	11		FL	271			0.39	kg							F	3
2	37	10	9	10	9.5	0.0526316			10	0			9.5	0.0526316		137	coney	TQ0600131-D	1	14	2006	11		FL	330			0.56	kg							U	3
2	38	5	4	4	4.5	0.111111			4.5	0.111111			4	0		138	coney	304014	4	4	2007	10		NC	293					CM							2
2	39	5	4	5	4.5	0.111111			5	0			4.5	0.111111		139	coney	304014	4	4	2007	10		NC	320					CM							1
2	40	16	16	19	16	0			17.5	0.0857143			17.5	0.0857143		140	coney	304231	1	15	2007	10		NC	385					CM							3
2	41	17	14	18	15.5	0.0967742			17.5	0.0285714			16	0.125		141	coney	304231	1	15	2007	10		NC	404					CM							3
2	42	4	3	4	3.5	0.142857			4	0			3.5	0.142857		142	coney	304278	2	14	2007	10		NC	253					CM							4
2	43	3	2	3	2.5	0.2			3	0			2.5	0.2		143	coney	304108	8	24	2007	10		NC	245					CM							3
2	44	4	3	3	3.5	0.142857			3.5	0.142857			3	0		144	coney	304108	8	24	2007	10		NC	275					CM							3
2	45	5	4	5	4.5	0.111111			5	0			4.5	0.111111		145	coney	304012	4	4	2007	10		NC	310					CM							2
2	46	3	3	3	3	0			3	0			3	0		146	coney	304023	4	24	2007	10		NC	250					CM							2
2	47	4	2	4	3	0.333333			4	0			3	0.333333		147	coney	304023	4	24	2007	10		NC	268					CM							3
2	48	4	3	5	3.5	0.142857			4.5	0.111111			4	0.25		148	coney	304085	6	11	2007	10		NC	237					CM							2
2	49	6	5	6	5.5	0.0909091			6	0			5.5	0.0909091		149	coney	304085	6	11	2007	10		NC	334					CM							2
2	50	5	4	4	4.5	0.111111			4.5	0.111111			4	0		150	coney	304042	5	4	2007	10		NC	288					CM							3
2	51	7	6	6	6.5	0.0769231			6.5	0.0769231			6	0		151	coney	304042	5	4	2007	10		NC	318					CM							2
2	52	4	3	4	3.5	0.142857			4	0			3.5	0.142857		152	coney	304044	5	14	2007	10		NC	277					CM							2
2	53	6	5	6	5.5	0.0909091			6	0			5.5	0.0909091		153	coney	304044	5	14	2007	10		NC	285					CM							2
2	54	4	4	4	4	0			4	0			4	0		154	coney	304044	5	14	2007	10		NC	287					CM							4
2	55	4	4	5	4	0			4.5	0.111111			4.5	0.111111		155	coney	303269	10	17	2007	10		NC	296					CM							3
2	56	5	5	6	5	0			5.5	0.0909091			5.5	0.0909091		156	coney	303931	3	2	2007	10		NC	294					CM							1
2	57	7	6	6	6.5	0.0769231			6.5	0.0769231			6	0		157	coney	303931	3	2	2007	10		NC	294					CM							3
2	58	4	2	3	3	0.333333			3.5	0.142857			2.5	0.2		158	coney	TQ0700888-D	4	10	2007	11		FL	245			0.26	kg								4
2	59	3	3	3	3	0			3	0			3	0		159	coney	TQ0700813-D	3	1	2007	11		FL	265			0.32	kg								4
2	60	5	5	5	5	0			5	0			5	0		160	coney	304098	7	19	2007	10		NC	321					CM							3
2	61	5	5	5	5	0			5	0			5	0		161	coney	303296	12	11	2007	10		NC	310					CM							4
2	62	7	7	6	7	0			6.5	0.0769231			6.5	0.0769231		162	coney	304099	7	27	2007	10		NC	356					CM							2
2	63	6	6	6	6	0			6	0			6	0		163	coney	20070130859	3	21	2007	5		SC	320					CM							4
2	64	4	3	4	3.5	0.142857			4	0			3.5	0.142857		164	coney	304092	6	18	2007	10		NC	270					CM							4
2	65	6	4	6	5	0.2			6	0			5	0.2		165	coney	304092	6	18	2007	10		NC	305					CM							2
2	66	7	6	6	6.5	0.0769231			6.5	0.0769231			6	0		166	coney	303094	12	3	2007	10		NC	357					CM							3
2	67	4	3	4	3.5	0.142857			4	0			3.5	0.142857		167	coney	303094	12	3	2007	10		NC	289					CM							3
2	68	5	4	5	4.5	0.111111			5	0			4.5	0.111111		168	coney	304106	8	22	2007	10		NC	308					CM							3
2	69	6	3	4	4.5	0.333333			5	0.2			3.5	0.142857		169	coney	303933	3	15	2007	10		NC	275					CM							2
2	70	9	9	11	9	0			10	0.1			10	0.1		170	coney	20070133507	10	30	2007	5		SC	310					CM							3
2	71	6	3	6	4.5	0.333333			6	0			4.5	0.333333		171	coney	303942	3	26	2007	10		NC	335					CM							1
2	72	5	4	5	4.5	0.111111			5	0			4.5	0.111111		172	coney	304009	4	11	2007	10		NC	280					CM							1
2	73	3	2	3	2.5	0.2			3	0			2.5	0.2		173	coney	304016	4	2	2007	10		NC	227					CM							4
2	74	5	4	5	4.5	0.111111			5	0			4.5	0.111111		174	coney	304104	8	22	2007	10		NC	290					CM							3
2	75	5	4	5	4.5	0.111111			5	0			4.5	0.111111		175	coney	303300	12	11	2007	10		NC	310					CM							4
2	76	2	2	3	2	0			2.5	0.2			2.5	0.2		176	coney	TQ0700118-D	1	13	2007	11		FL	285			0.39	kg							U	4
2	77	7	6	8	6.5	0.0769231			7.5	0.0666667			7	0.142857		177	coney	304276	2	13	2007	10		NC	293					CM							2
2	78	10	7	9	8.5	0.176471			9.5	0.0526316			8	0.125		178	coney	304276	2	13	2007	10		NC	335					CM							4
2	79	8	7	7	7.5	0.0666667			7.5	0.0666667			7	0		179	coney	303478	12	12	2007	10		NC	335					CM							4
2	80	7	6	7	6.5	0.0769231			7	0			6.5	0.0769231		180	coney	303478	12	12	2007	10		NC	370					CM							3
2	81	2	3	3	2.5	0.2			2.5	0.2			3	0		181	coney	304013	4	4	2007	10		NC	263					CM							4
2	82	3	3	5	3	0			4	0.25			4	0.25		182	coney	304013	4	4	2007	10		NC	313					CM							4
2	83	5	4	5	4.5	0.111111			5	0			4.5	0.111111		183	coney	304013	4	4	2007	10		NC	355					CM							2
2	84	6	4	6	5	0.2			6	0			5	0.2		184	coney	304013	4	4	2007	10		NC	392					CM							1
2	85	4	3	4	3.5	0.142857			4	0			3.5	0.142857		185	coney	302334	11	9	2007	10		NC	289					CM							3
2	86	3	3	4	3	0			3.5	0.142857			3.5	0.142857		186	coney	302329	10	26	2007	10		NC	293					CM							4
2	87	6	5	5	5.5	0.0909091			5.5	0.0909091			5	0		187	coney	302329	10	26	2007	10		NC	333					CM							2
2	88	5	5	5	5	0			5	0			5	0		188	coney	302239	10	26	2007	10		NC	338					CM							3
2	89	7	4	6	5.5	0.272727			6.5	0.0769231			5	0.2		189	coney	302333	11	9	2007	10		NC	347					CM							3
2	90	4	3	4	3.5	0.142857			4	0			3.5	0.142857		190	coney	20070281623	10	15	2007	7		FL	341					CM							3
2	91	4	4	5	4	0			4.5	0.111111			4.5	0.111111		191	coney	TQ0703426-D	12	7	2007	11		FL	302			0.51	kg							U	4
2	92	4	2	4	3	0.333333			4	0			3	0.333333		192	coney	TQ0703551-D	12	20	2007	11		FL	310			0.52	kg							U	4
2	93	1	2	2	1.5	0.333333			1.5	0.333333			2	0		193	coney	TQ0703427-D	12	7	2007	11		FL	225			0.22	kg							U	4
2	94	2	2	3	2	0			2.5	0.2			2.5	0.2		194	coney	TQ0701801-D	6	29	2007	11		FL	260			0.32	kg							M	2
2	95	5		4					4.5	0.111111						195	coney	TQ0701802-D	6	29	2007	11		FL	227			0.21	kg							U	2
2	96	8	4	7	6	0.333333			7.5	0.0666667			5.5	0.272727		196	coney	302729	1	8	2008	10		NC	340					CM							3
2	97	7	6	7	6.5	0.0769231			7	0			6.5	0.0769231		197	coney	302891	8	14	2008	10		NC	372					CM							2
2	98	4	3	4	3.5	0.142857			4	0			3.5	0.142857		198	coney	TQ0800023-D	1	9	2008	11		FL	310			0.51	kg							F	4
2	99	3	3	4	3	0			3.5	0.142857			3.5	0.142857		199	coney	TQ0800297-D	2	3	2008	11		FL	262											F	4
2	100	6	4	5	5	0.2			5.5	0.0909091			4.5	0.111111		200	coney	302585	2	6	2008	10		NC	319					CM							2
3	1	5	5	5	5	0			5	0			5	0		201	coney	302585	2	6	2008	10		NC	326					CM							4
3	2	5	4	4	4.5	0.111111			4.5	0.111111			4	0		202	coney	20080130440	2	13	2008	5		SC	300					CM							3
3	3	5	5	5	5	0			5	0			5	0		203	coney	TQ0800365-D	2	14	2008	11		FL	250			0.28	kg							U	3
3	4	5	5	5	5	0			5	0			5	0		204	coney	20080130899	4	28	2008	5		SC	320					CM							2
3	5	6	5	5	5.5	0.0909091			5.5	0.0909091			5	0		205	coney	302792	4	28	2008	10		NC	291					CM							2
3	6	4	3	4	3.5	0.142857			4	0			3.5	0.142857		206	coney	303825	4	8	2005	10		NC	340					CM							3
3	7	4	3	4	3.5	0.142857			4	0			3.5	0.142857		207	coney	302608	5	5	2008	10		NC	348					CM							2
3	8	5	4	4	4.5	0.111111			4.5	0.111111			4	0		208	coney	302802	5	16	2008	10		NC	302					CM							2
3	9	9	7	5	8	0.125			7	0.285714			6	0.166667		209	coney	302665	6	5	2008	10		NC	328					CM							2
3	10	11	11	11	11	0			11	0			11	0		210	coney	20080131237	6	6	2008	5		SC	400					CM							2
3	11	6	4	7	5	0.2			6.5	0.0769231			5.5	0.272727		211	coney	302669	6	6	2008	10		NC	340					CM							2
3	12															212	coney
3	13	6	5	5	5.5	0.0909091			5.5	0.0909091			5	0		213	coney	20080131488	6	20	2008	5		SC	300					CM							2
3	14	6	6	6	6	0			6	0			6	0		214	coney	302816	6	23	2008	10		NC	278					CM							3
3	15															215	coney
3	16	5	6	5	5.5	0.0909091			5	0			5.5	0.0909091		216	coney	302685	7	2	2008	10		NC	317					CM							3
3	17	5	5	5	5	0			5	0			5	0		217	coney	302824	7	7	2008	10		NC	320					CM							3
3	18	5	6	5	5.5	0.0909091			5	0			5.5	0.0909091		218	coney	302827	7	14	2008	10		NC	320					CM							2
3	19	6	6	6	6	0			6	0			6	0		219	coney	302709	7	16	2008	10		NC	297					CM							2
3	20	6	7	7	6.5	0.0769231			6.5	0.0769231			7	0		220	coney	302709	7	16	2008	10		NC	327					CM							2
3	21	12	13	10	12.5	0.04			11	0.0909091			11.5	0.130435		221	coney	302884	7	31	2008	10		NC	362					CM							2
3	22	4	5	5	4.5	0.111111			4.5	0.111111			5	0		222	coney	302843	8	6	2008	10		NC	324					CM							3
3	23	5	4	5	4.5	0.111111			5	0			4.5	0.111111		223	coney	302889	8	12	2008	10		NC	325					CM							3
3	24	5	5	5	5	0			5	0			5	0		224	coney	302889	8	12	2008	10		NC	330					CM							3
3	25	6	7	7	6.5	0.0769231			6.5	0.0769231			7	0		225	coney	302889	8	12	2008	10		NC	326					CM							3
3	26	3		3	3	0			3	0						226	coney	302890	8	13	2008	10		NC	237					CM							3
3	27	5	4	4	4.5	0.111111			4.5	0.111111			4	0		227	coney	302890	8	13	2008	10		NC	320					CM							3
3	28	5	5	5	5	0			5	0			5	0		228	coney	302890	8	13	2008	10		NC	261					CM							3
3	29	6	6	7	6	0			6.5	0.0769231			6.5	0.0769231		229	coney	302892	8	14	2008	10		NC	365					CM							3
3	30	5	4	5	4.5	0.111111			5	0			4.5	0.111111		230	coney	302894	8	18	2008	10		NC	342					CM							3
3	31	4	4	4	4	0			4	0			4	0		231	coney	302893	8	18	2008	10		NC	299					CM							3
3	32	7	8	8	7.5	0.0666667			7.5	0.0666667			8	0		232	coney	302894	8	18	2008	10		NC	361					CM							3
3	33	5	4	5	4.5	0.111111			5	0			4.5	0.111111		233	coney	302894	8	18	2008	10		NC	300					CM							3
3	34	4	4	4	4	0			4	0			4	0		234	coney	20080132161	8	21	2008	5		SC	320					CM							3
3	35	6	6	6	6	0			6	0			6	0		235	coney	302870	10	2	2008	10		NC	295					cm							4
3	36	4	4	5	4	0			4.5	0.111111			4.5	0.111111		236	coney	302870	10	2	2008	10		NC	362					CM							3
3	37	7	7	7	7	0			7	0			7	0		237	coney	302444	10	6	2008	10		NC	300					CM							3
3	38	5	5	6	5	0			5.5	0.0909091			5.5	0.0909091		238	coney	302925	10	6	2008	10		NC	316					CM							3
3	39	4	5	5	4.5	0.111111			4.5	0.111111			5	0		239	coney	302925	10	6	2008	10		NC	251					CM							4
3	40	5	5	5	5	0			5	0			5	0		240	coney	302446	10	17	2008	10		NC	300					CM							3
3	41	4	4	4	4	0			4	0			4	0		241	coney	302940	10	23	2008	10		NC	296					CM							4
3	42	6	5	5	5.5	0.0909091			5.5	0.0909091			5	0		242	coney	302940	10	23	2008	10		NC	325					CM							3
3	43	8	8	8	8	0			8	0			8	0		243	coney	302	11	18	2008	10		NC	380					CM							3
3	44	5	5	6	5	0			5.5	0.0909091			5.5	0.0909091		244	coney	20080133151	11	24	2008	5		SC	330					CM							4
3	45	8	8	9	8	0			8.5	0.0588235			8.5	0.0588235		245	coney	20080133225	11	25	2008	5		SC	326					CM							3
3	46	6	8	6	7	0.142857			6	0			7	0.142857		246	coney	302462	11	25	2008	10		NC	348					CM							4
3	47	6	5	6	5.5	0.0909091			6	0			5.5	0.0909091		247	coney	300081	1	26	2009	10		NC	304					CM							4
3	48	5	3	4	4	0.25			4.5	0.111111			3.5	0.142857		248	coney	20091300442	2	18	2009	5		SC	340					CM							1
3	49		3										3	0		249	coney	2009130443	2	18	2009	5		SC	350					CM
3	50	8	7	9	7.5	0.0666667			8.5	0.0588235			8	0.125		250	coney	300081	2	27	2009	10		NC	350					CM							4
3	51	5	5	6	5	0			5.5	0.0909091			5.5	0.0909091		251	coney	300081	2	27	2009	10		NC	357					CM							4
3	52	7	7	7	7	0			7	0			7	0		252	coney	300081	2	27	2009	10		NC	342					CM							1
3	53	4	5	5	4.5	0.111111			4.5	0.111111			5	0		253	coney	300081	2	27	2009	10		NC	298					CM							4
3	54	6	4	6	5	0.2			6	0			5	0.2		254	coney	300086	3	9	2009	10		NC	330					CM							4
3	55	5	3	5	4	0.25			5	0			4	0.25		255	coney	TQ0901101-D	3	22	2009	11		FL	295			0.82	kg							F	1
3	56	8	8	8	8	0			8	0			8	0		256	coney	300114	4	20	2009	10		NC	352					CM							1
3	57	5	4	5	4.5	0.111111			5	0			4.5	0.111111		257	coney	300115	4	20	2009	10		NC	308					CM							2
3	58	6	5	5	5.5	0.0909091			5.5	0.0909091			5	0		258	coney	300115	4	20	2009	10		NC	325					CM							2
3	59	7	5	6	6	0.166667			6.5	0.0769231			5.5	0.0909091		259	coney	299926	4	27	2009	10		NC	290					CM							1
3	60	6	6	6	6	0			6	0			6	0		260	coney	299926	4	27	2009	10		NC	338					CM							2
3	61	4	4	4	4	0			4	0			4	0		261	coney	300122	4	28	2009	10		NC	307					CM							2
3	62	5	5	5	5	0			5	0			5	0		262	coney	300123	4	29	2009	10		NC	300					CM							2
3	63	8		7					7.5	0.0666667						263	coney	300123	4	29	2009	10		NC	378					CM							1
3	64	5	3	4	4	0.25			4.5	0.111111			3.5	0.142857		264	coney	299933	5	14	2009	10		NC	330					CM							4
3	65	6	3	6	4.5	0.333333			6	0			4.5	0.333333		265	coney	299933	5	14	2009	10		NC	305					CM							2
3	66	4	4	4	4	0			4	0			4	0		266	coney	20091390948	5	5	2009	10		NC	300					CM							4
3	67	4	3	4	3.5	0.142857			4	0			3.5	0.142857		267	coney	20091390949	5	5	2009	10		NC	330					CM							4
3	68	5	4	4	4.5	0.111111			4.5	0.111111			4	0		268	coney	20091390950	5	5	2009	10		NC	350					CM							2
3	69	7	7	8	7	0			7.5	0.0666667			7.5	0.0666667		269	coney	300131	5	8	2009	10		NC	359					CM							2
3	70	6	6	6	6	0			6	0			6	0		270	coney	299931	5	12	2009	10		NC	318					CM							1
3	71	8	8	9	8	0			8.5	0.0588235			8.5	0.0588235		271	coney	299931	5	12	2009	10		NC	318					CM							1
3	72	6	6	7	6	0			6.5	0.0769231			6.5	0.0769231		272	coney	300134	5	14	2009	10		NC	328					CM							2
3	73	8	6	6	7	0.142857			7	0.142857			6	0		273	coney	300177	6	1	2009	10		NC	329			0.635	kg	CM							2
3	74	5	5	5	5	0			5	0			5	0		274	coney	299955	6	23	2009	10		NC	261					CM							4
3	75	6	5	5	5.5	0.0909091			5.5	0.0909091			5	0		275	coney	299955	6	23	2009	10		NC	330					CM							1
3	76	5	5	5	5	0			5	0			5	0		276	coney	299956	6	25	2009	10		NC	324					CM							2
3	77															277	coney	299956	6	25	2009	10		NC	306					CM
3	78	8	7	8	7.5	0.0666667			8	0			7.5	0.0666667		278	coney	300166	6	30	2009	10		NC	362					CM							2
3	79	6	7	6	6.5	0.0769231			6	0			6.5	0.0769231		279	coney	299960	7	2	2009	10		NC	309					CM							4
3	80	6	8	6	7	0.142857			6	0			7	0.142857		280	coney	300172	7	8	2009	10		NC	285					CM							2
3	81	11	12	15	11.5	0.0434783			13	0.153846			13.5	0.111111		281	coney	TQ0902892-D	7	12	2009	11		FL	285			0.43	kg							F	2
3	82	6	7	7	6.5	0.0769231			6.5	0.0769231			7	0		282	coney	TQ0902892-D	7	12	2009	11		FL	345											F	2
3	83															283	coney
3	84															284	coney
3	85															285	coney
3	86	9	8	11	8.5	0.0588235			10	0.1			9.5	0.157895		286	coney	20091391697	7	14	2009	5		SC	380					CM							2
3	87															287	coney
3	88	3	2	2	2.5	0.2			2.5	0.2			2	0		288	coney	TQ0903738-D	8	27	2009	11		FL	282			0.41	kg							F	2
3	89	5		6	5	0			5.5	0.0909091						289	coney	TQ0903739	8	27	2009	11		FL	345			0.61	kg							U	2
3	90	5	4	5	4.5	0.111111			5	0			4.5	0.111111		290	coney	300002	9	8	2009	10		NC	328					CM							2
3	91	4	2	3	3	0.333333			3.5	0.142857			2.5	0.2		291	coney	TQ0904238-D	11	25	2009	11		FL	322			0.43	kg							U	3
3	92	6	6	8	6	0			7	0.142857			7	0.142857		292	coney	42238-22	4	22	2010	17		FL	287			0.39	kg	REC	HB						1
3	93	6	7	8	6.5	0.0769231			7	0.142857			7.5	0.0666667		293	coney	311983	5	17	2010	10		NC	296					CM							2
3	94	7	6	7	6.5	0.0769231			7	0			6.5	0.0769231		294	coney	311983	5	17	2009	10		NC	305					CM							2
3	95															295	coney
3	96															296	coney
3	97	6	6	6	6	0			6	0			6	0		297	coney	311983	5	17	2010	10		NC	350					CM							2
3	98	6	6	8	6	0			7	0.142857			7	0.142857		298	coney	311983	5	17	2010	10		NC	354					CM							2
3	99		2	2									2	0		299	coney	MI1001006-D	5	31	2009	12		FL	255											U	4
3	100	6	5	5	5.5	0.0909091			5.5	0.0909091			5	0		300	coney	312023	8	18	2010	10		NC	310					CM							2
4	1	6	5	6	5.5	0.0909091			6	0			5.5	0.0909091		301	coney	312023	8	18	2010	10		NC	330					CM							2
4	2	8	6	7	7	0.142857			7.5	0.0666667			6.5	0.0769231		302	coney	312023	8	18	2010	10		NC	334					CM							2
4	3	7	6	7	6.5	0.0769231			7	0			6.5	0.0769231		303	coney	312023	8	18	2010	10		NC	341					CM							3
4	4	7	7	7	7	0			7	0			7	0		304	coney	312152	8	19	2010	10		NC	334			0.67	lbs	CM							2
4	5	9	7	9	8	0.125			9	0			8	0.125		305	coney	312512	8	19	2010	10		NC	336			0.67	lbs	CM							2
4	6	6	5	6	5.5	0.0909091			6	0			5.5	0.0909091		306	coney	312167	9	9	2010	10		NC	360			0.86	lbs	CM							3
4	7	7	6	8	6.5	0.0769231			7.5	0.0666667			7	0.142857		307	coney	311866	9	16	2010	10		NC	373					CM							2
4	8	6	6	6	6	0			6	0			6	0		308	coney	311870	9	17	2010	10		NC	298			0.58	lbs	CM							3
4	9	7	7	8	7	0			7.5	0.0666667			7.5	0.0666667		309	coney	311870	9	17	2010	10		NC	343			0.84	lbs	CM							3
4	10	5	3	5	4	0.25			5	0			4	0.25		310	coney	TQ1003248-D	10	2	2010	11		FL	280			0.39	kg							F	2
4	11	3	3	3	3	0			3	0			3	0		311	coney	311881	10	12	2010	10		NC	271			0.4	lbs	CM							3
4	12	12	6	13	9	0.333333			12.5	0.04			9.5	0.368421		312	coney	311889	10	14	2010	10		NC	355			0.85	lbs	CM							3
4	13	10	9	11	9.5	0.0526316			10.5	0.047619			10	0.1		313	coney	311901	10	28	2010	10		NC	354			0.85	lbs	CM							3
4	14	5	6	6	5.5	0.0909091			5.5	0.0909091			6	0		314	coney	311901	10	28	2010	10		NC	316			0.66	lbs	CM							4
4	15	6	6	8	6	0			7	0.142857			7	0.142857		315	coney	311902	10	28	2010	10		NC	380			0.8	lbs	CM							3
4	16	8	7	9	7.5	0.0666667			8.5	0.0588235			8	0.125		316	coney	311092	10	28	2010	10		NC	343			0.8	lbs	CM							3
4	17	6	5	6	5.5	0.0909091			6	0			5.5	0.0909091		317	coney	322150	5	4	2011	10		NC	325					CM							1
4	18															318	coney
4	19		6	6									6	0		319	coney	322150	5	4	2011	10		NC	361					CM							4
4	20	4	4	4	4	0			4	0			4	0		320	coney	322160	5	23	2011	10		NC	296					CM							2
4	21	6	5	7	5.5	0.0909091			6.5	0.0769231			6	0.166667		321	coney	322163	5	23	2011	10		NC	294					CM							4
4	22	8	8	7	8	0			7.5	0.0666667			7.5	0.0666667		322	coney	322190	7	14	2011	10		NC	325					CM							2
4	23	5	3	4	4	0.25			4.5	0.111111			3.5	0.142857		323	coney	322323	7	19	2011	10		NC	377			0.4	lbs	CM						F	2
4	24	7	6	7	6.5	0.0769231			7	0			6.5	0.0769231		324	coney	322196	8	15	2011	10		NC	334					CM							3
4	25	4	3	4	3.5	0.142857			4	0			3.5	0.142857		325	coney	322351	8	22	2011	10		NC	307			0.5	lbs	CM							3
4	26	5	4	5	4.5	0.111111			5	0			4.5	0.111111		326	coney	322395	10	18	2011	10		NC	304			0.5	lbs	CM							3
4	27	4	3	4	3.5	0.142857			4	0			3.5	0.142857		327	coney	20111393999	10	18	2011	5		SC	330					CM							3
4	28	9	9	10	9	0			9.5	0.0526316			9.5	0.0526316		328	coney	322230	10	19	2011	10		NC	402					CM							2
4	29	9	9	9	9	0			9	0			9	0		329	coney	322404	10	27	2011	10		NC	373			0.9	lbs	CM							3
4	30	5	4	5	4.5	0.111111			5	0			4.5	0.111111		330	coney	20111394234	10	31	2011	10		NC	290					cm							3
4	31	5	4	6	4.5	0.111111			5.5	0.0909091			5	0.2		331	coney	MI1101249-D	11	23	2011	11		FL	265			0.34	kg							M	3
4	32	12	10	13	11	0.0909091			12.5	0.04			11.5	0.130435		332	coney	20111394415	11	28	2011	5		SC	340					CM							3
4	33	7	7	8	7	0			7.5	0.0666667			7.5	0.0666667		333	coney	322437	12	8	2011	10		NC	350			0.8	lbs	CM							4
4	34	6	7	8	6.5	0.0769231			7	0.142857			7.5	0.0666667		334	coney	322437	12	8	2011	10		NC	357			0.8	lbs	CM							3
4	35	8	7	8	7.5	0.0666667			8	0			7.5	0.0666667		335	coney	322437	12	8	2011	10		NC	329			0.6	lbs	CM							3
4	36	8	7	8	7.5	0.0666667			8	0			7.5	0.0666667		336	coney	322	12	8	2011	10		NC	362			1	lbs	CM							3
4	37	12	9	12	10.5	0.142857			12	0			10.5	0.142857		337	coney	326481	5	10	2012	10		NC	370			2	lbs	CM							1
4	38	7	6	7	6.5	0.0769231			7	0			6.5	0.0769231		338	coney	326481	5	10	2012	10		NC	329			2	lbs	CM							4
4	39	5	4	5	4.5	0.111111			5	0			4.5	0.111111		339	coney	326482	5	10	2012	10		NC	331			1	lbs	CM							4
4	40	12	10	13	11	0.0909091			12.5	0.04			11.5	0.130435		340	coney	20121850090	6	6	2012	10		NC	372					CM							1
4	41	8	6	9	7	0.142857			8.5	0.0588235			7.5	0.2		341	coney	326525	6	22	2012	10		NC	363					CM							4
4	42	8	6	8	7	0.142857			8	0			7	0.142857		342	coney	326525	6	22	2012	10		NC	345					CM							4
4	43	10	8	10	9	0.111111			10	0			9	0.111111		343	coney	326690	7	3	2012	10		NC	350					CM							2
4	44	4		4					4	0						344	coney	20121850666	8	13	2012	10		NC	292					CM							2
4	45	8	9	8	8.5	0.0588235			8	0			8.5	0.0588235		345	coney	20121850667	8	13	2012	10		NC	343					CM							2
4	46	7	8	8	7.5	0.0666667			7.5	0.0666667			8	0		346	coney	322586	9	17	2012	10		NC	343					CM							2
4	47	8	8	9	8	0			8.5	0.0588235			8.5	0.0588235		347	coney	322586	9	17	2012	10		NC	371					cm							2
4	48	6	6	9	6	0			7.5	0.2			7.5	0.2		348	coney	326586	9	17	2012	10		NC	296					CM							3
4	49	8	7	8	7.5	0.0666667			8	0			7.5	0.0666667		349	coney	326711	9	27	2012	10		NC	365					CM							4
4	50	8	8	9	8	0			8.5	0.0588235			8.5	0.0588235		350	coney	326592	10	8	2012	10		NC	326					CM							3
4	51	16	16	16	16	0			16	0			16	0		351	coney	44292-05	6	12	2012	12		FL	347			0.65	kg	rec	hb						1
4	52	6	6	6	6	0			6	0			6	0		352	coney	44292-14	6	12	2012	12		FL	285			0.37	kg	rec	hb						2
4	53	15	13	19	14	0.0714286			17	0.117647			16	0.1875		353	coney	20131391471	6	26	2013	5		SC	400					CM							4
4	54	7	6	9	6.5	0.0769231			8	0.125			7.5	0.2		354	coney	44712-05	6	30	2012	12		FL	305			0.47	kg	rec	hb						2
4	55	10	10	10	10	0			10	0			10	0		355	coney	44712-16	6	30	2012	12		FL	315			0.49	kg	rec	hb						1
4	56	10		10	10	0			10	0			10			356	coney	331139	7	8	2013	10		NC	310					CM							2
4	57	9	9		9	0			9	0						357	coney	331139	7	8	2013	10		NC	345					CM							2
4	58	12		17	12	0			14.5	0.172414			17			358	coney	331146	8	9	2013	10		NC	388					CM							3
4	59	9	9	12	9	0			10.5	0.142857			10.5	0.142857		359	coney	44442-05	8	13	2013	12		FL	281			0.38	kg	rec	hb					F	2
4	60	7	7	7	7	0			7	0			7	0		360	coney	331151	8	29	2013	10		NC	310					CM							2
4	61	10	9	10	9.5	0.0526316			10	0			9.5	0.0526316		361	coney	331089	9	13	2013	10		NC	333					CM						F	3
4	62	8	8	9	8	0			8.5	0.0588235			8.5	0.0588235		362	coney	331089	9	13	2013	10		NC	287					CM							2
4	63	11	10	10	10.5	0.047619			10.5	0.047619			10	0		363	coney	331276	10	3	2013	10		NC	360					CM							3
4	64	9	7	11	8	0.125			10	0.1			9	0.222222		364	coney	20131392686	10	15	2013	5		SC	384					CM							3
4	65	7	6	6	6.5	0.0769231			6.5	0.0769231			6	0		365	coney	44788-24	10	16	2013				217			0.18	kg	rec	hb					F	2
4	66	6	5	7	5.5	0.0909091			6.5	0.0769231			6	0.166667		366	coney	46228	10	25	2013	12		FL	320			0.53	kg	rec	hb						3
